# Supplementary material for: Visible light-driven photocatalytic activity of wide band gap ATiO3 (A = Sr, Zn and Cd) perovskites by lanthanide doping and the formation of a mesoporous heterostructure with ZnS QDs
Source: Royal Society of Chemistry journal article supplement (doi:10.1039/d2dt01751b), 2022-01-01
Supplement: d2dt01751b1.pdf [file d2dt01751b1.pdf]

**Supplementary Material For:**

**Visible light-driven photocatalytic activity of wide band gap ATiO<sub>3</sub> (A=Sr, Zn and Cd)  
perovskites by lanthanide doping and formation of mesoporous heterostructure with ZnS  
QDs**

Elnaz Zehtab-Lotfi<sup>a</sup>, Ali Reza Amani-Ghadim<sup>b,c,\*</sup>, Behzad Soltani<sup>a</sup>

<sup>a</sup>Department of Chemistry, Faculty of Science, Azarbaijan Shahid Madani University (ASMU),  
Tabriz 53751-71379, Iran

<sup>b</sup>Applied Chemistry Research laboratory, Department of Chemistry, Faculty of Basic Science,  
Azarbaijan Shahid Madani University (ASMU), Tabriz 53751-71379, Iran

<sup>c</sup>New Technologies in the Environment Research Center, Azarbaijan Shahid Madani  
University (ASMU), Tabriz 53751-71379, Iran

Corresponding Author's E-mail addresses:

a.r\_amani@yahoo.com; amani.gh@azaruniv.ac.ir

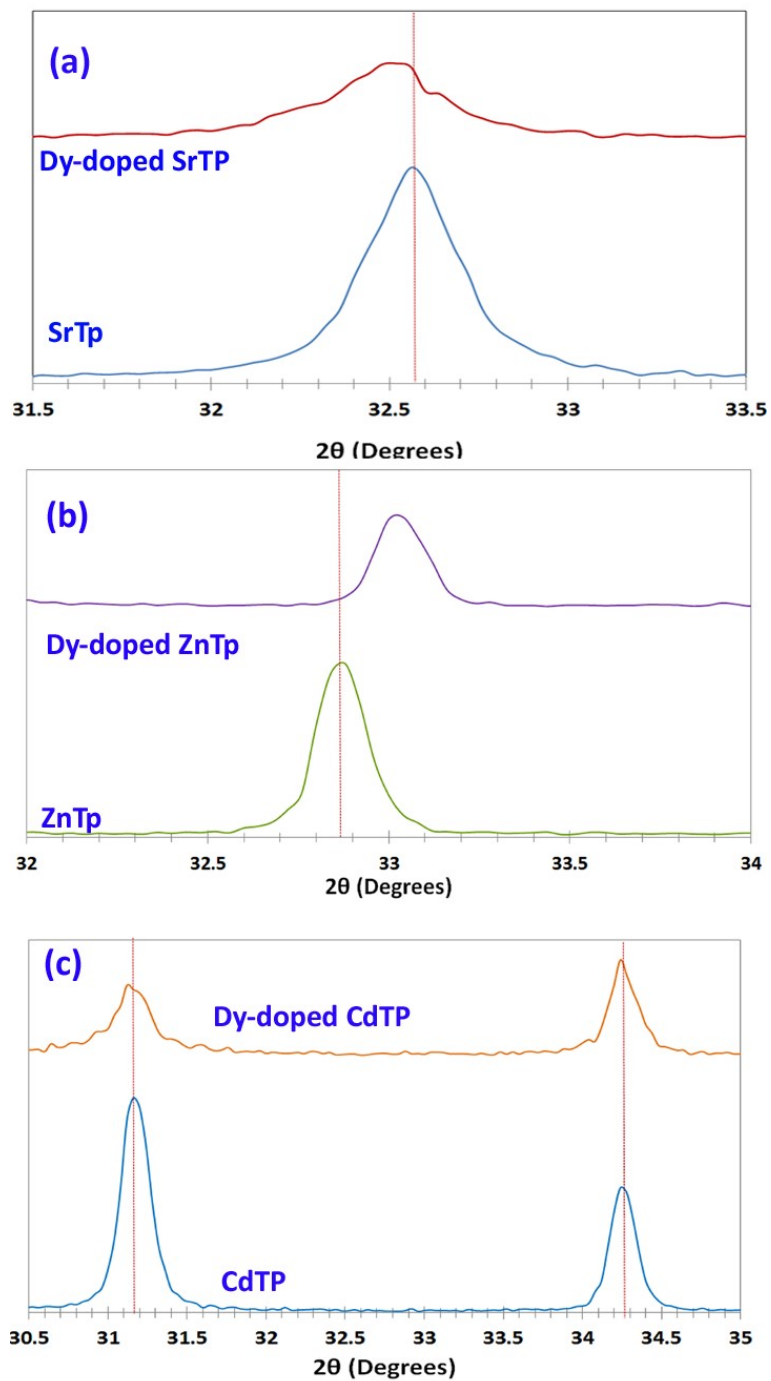

**Fig. S1.** Enlarged XRD patterns of  $ATiO_3$  ( $A=Sr, Zn$  and  $Cd$ ) and Dy-doped  $ATiO_3$  samples.

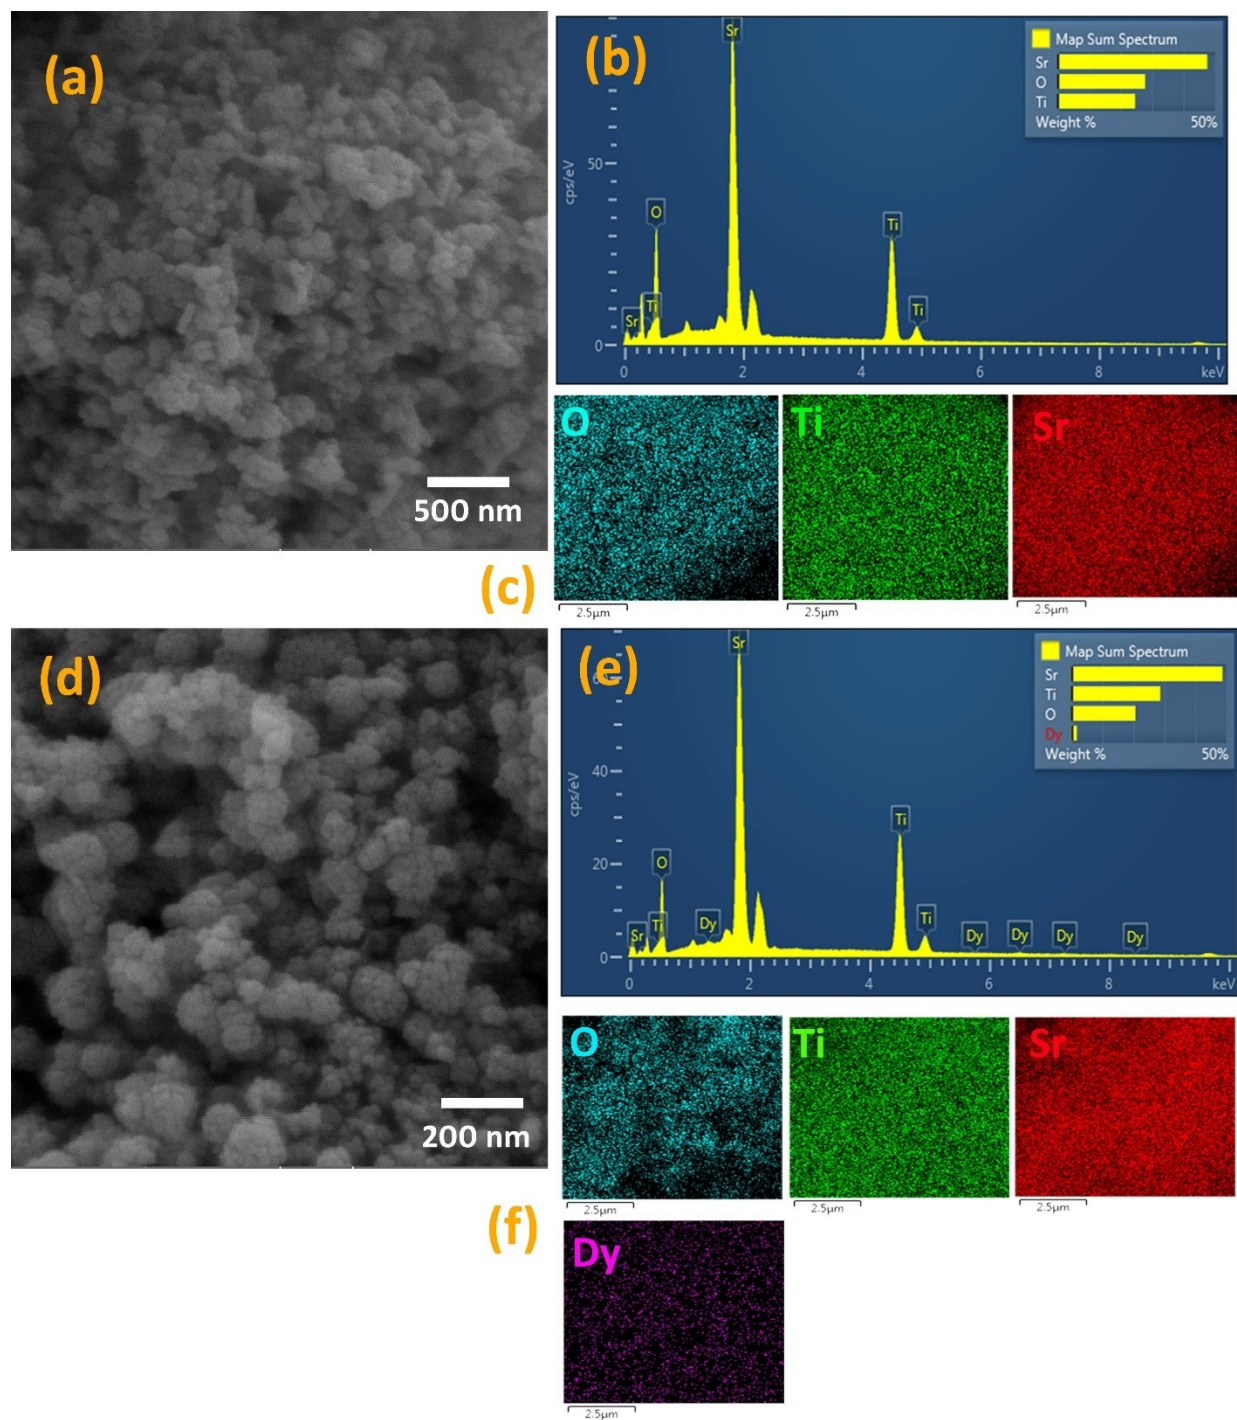

**Fig. S2.** FESEM images and EDX spectrum accompanied by EDX mapping for SrTP (a-c) and Dy doped-SrTP (d-f).

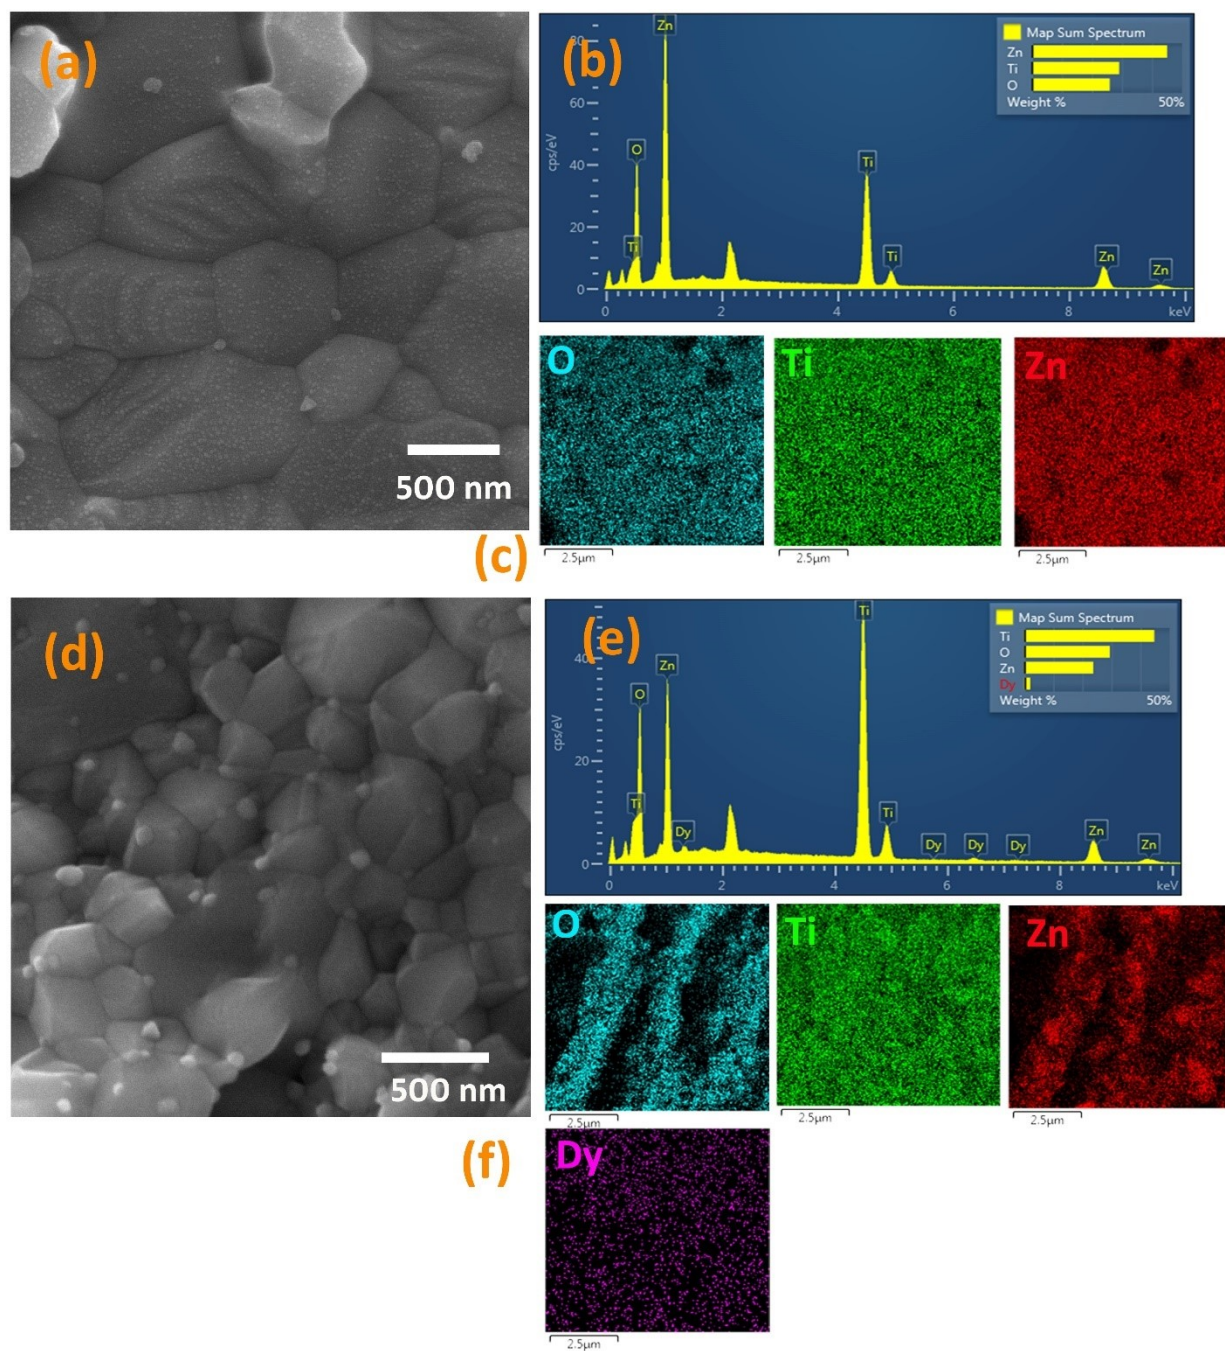

**Fig. S3.** FESEM images and EDX spectrum accompanied by EDX mapping for ZnTP (a-c) and Dy doped-ZnTP (d-f).

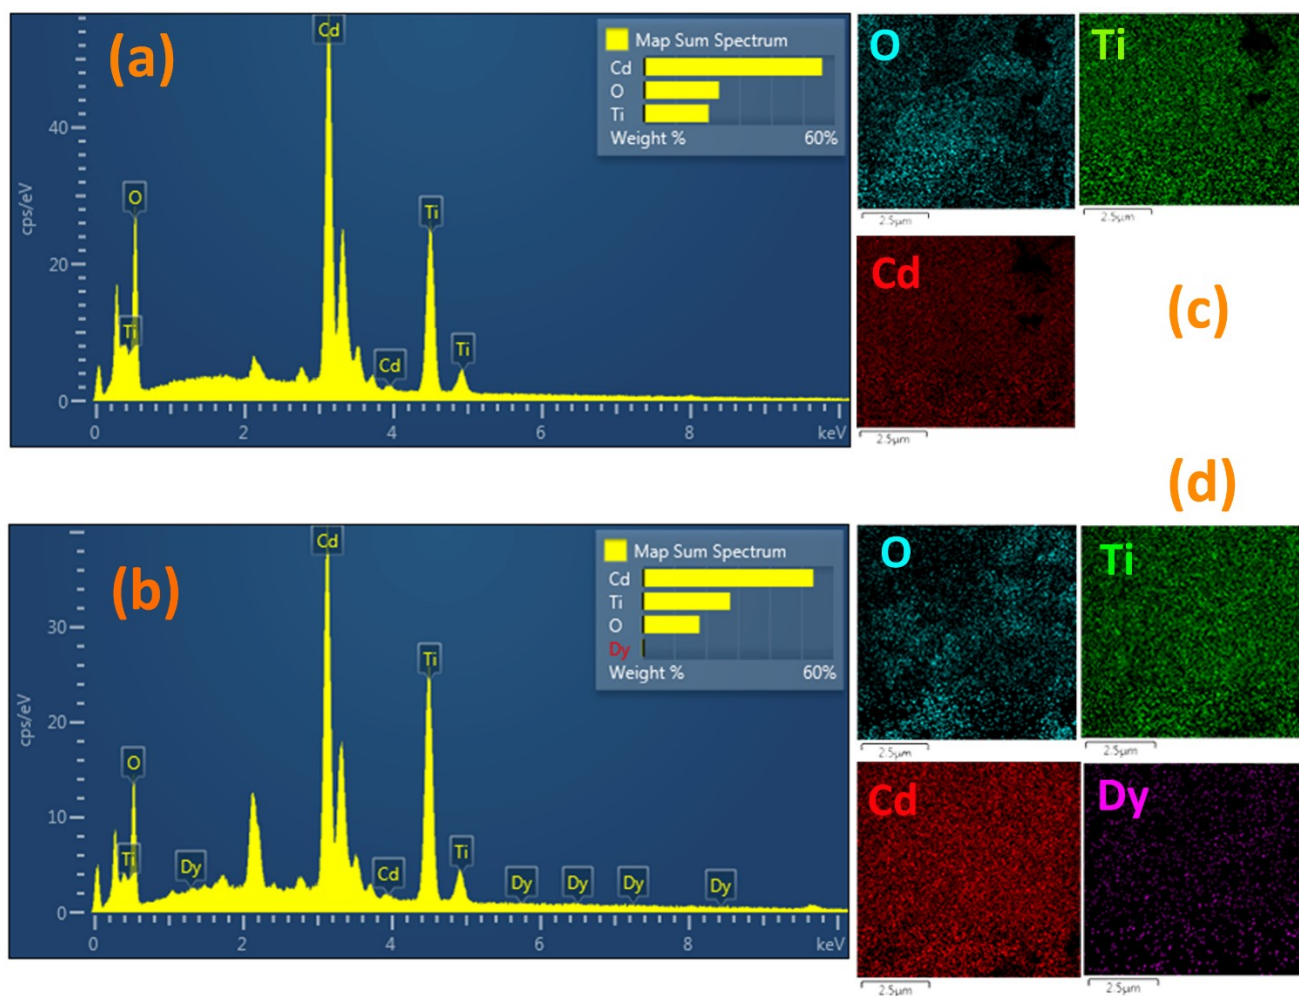

**Fig. S4.** EDX spectrum accompanied by EDX mapping for CdTP (a, b) and Dy doped-CdTP (c-d).

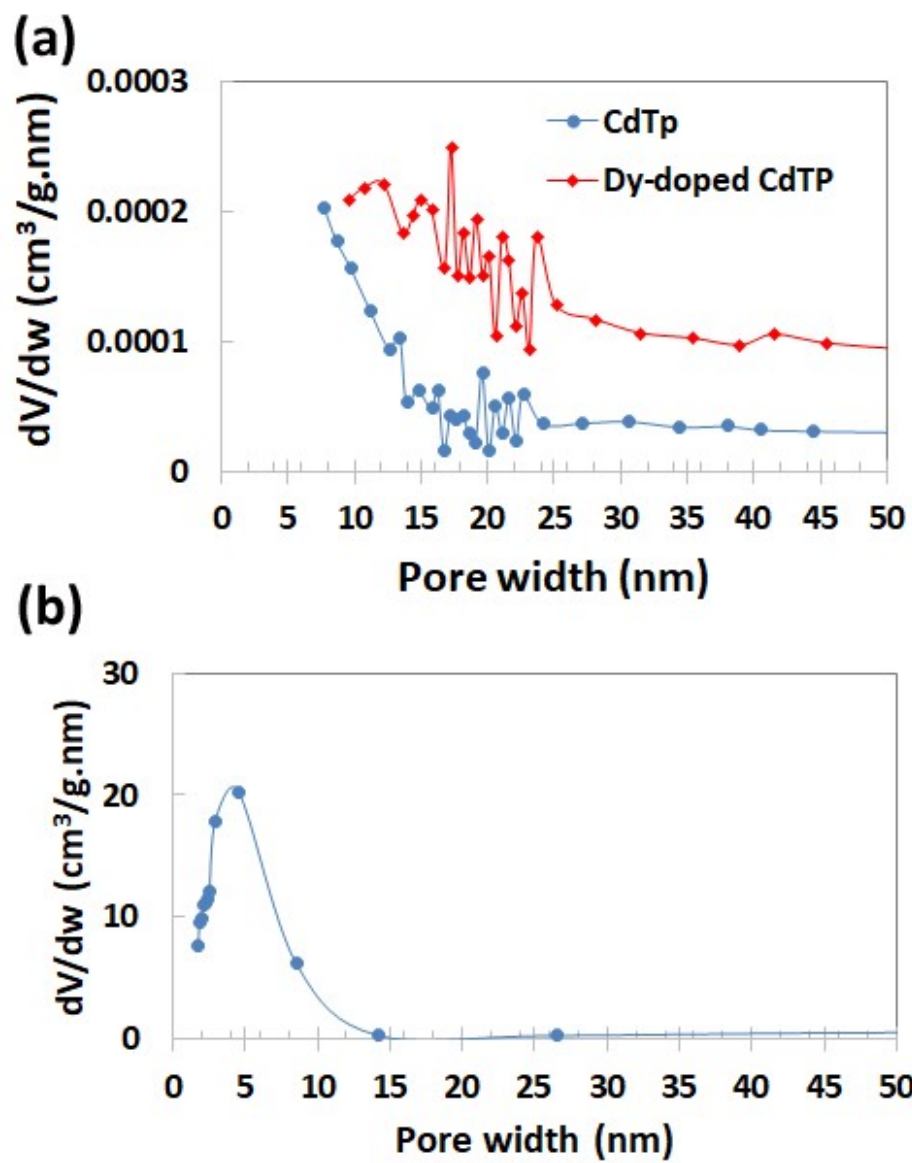

**Fig. S5.** BJH pore size distribution curves of (a) CdTP and Dy-doped CdTP and (b) Dy-CdTP(0.6)/ZnS QD nanocomposite

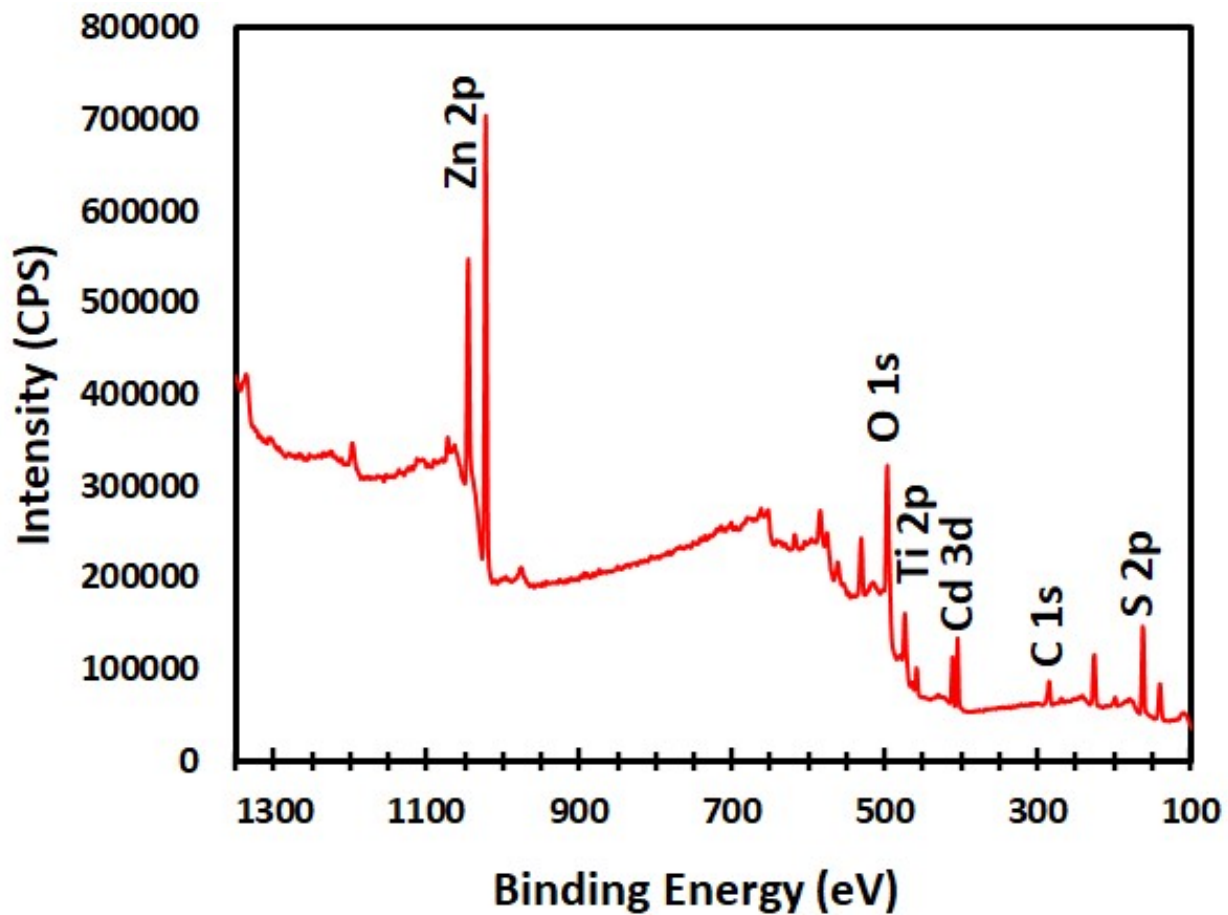

Fig. S6. XPS survey spectra of Dy-CdTP(0.6)/ZnS QD nanocomposite.

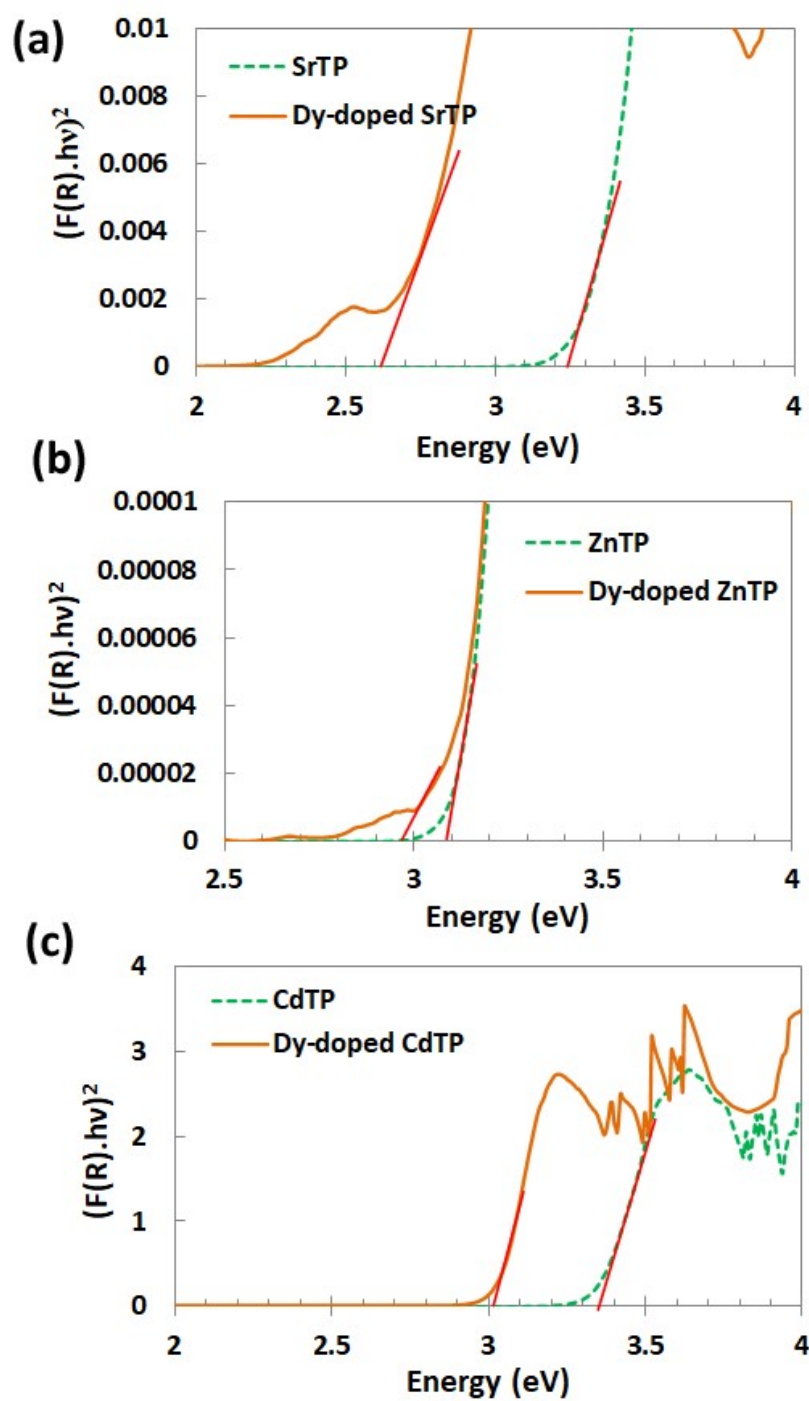

**Fig. S7.** Kubelka-Munk function vs. the energy of incident light plots of (a) SrTP and Dy-doped SrTP, (b) ZnTP and Dy-doped ZnTP, and (c) CdTP and Dy-doped CdTP.



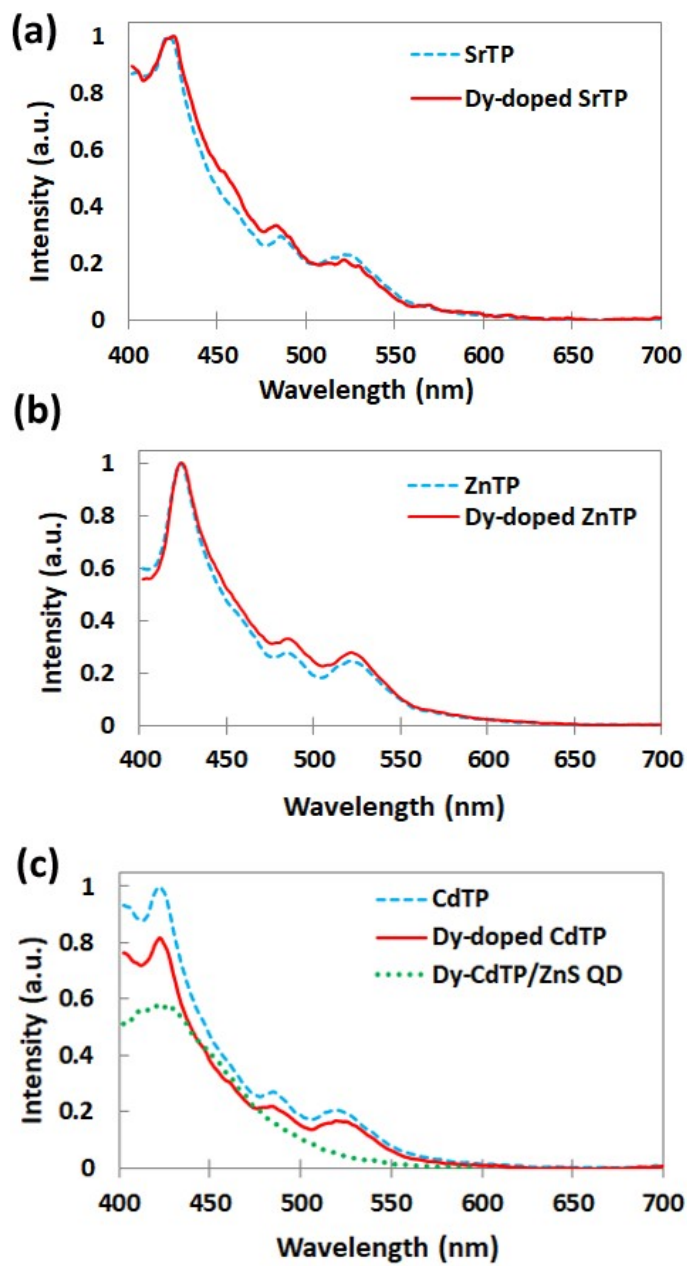

**Fig. S8.** PL spectra (excited at 380 nm) (a) SrTP and Dy-doped SrTP, (b) ZnTP and Dy-doped ZnTP, and (c) CdTP, Dy-doped CdTP and Dy-CdTP(0.6)/ZnS QD nanocomposite.

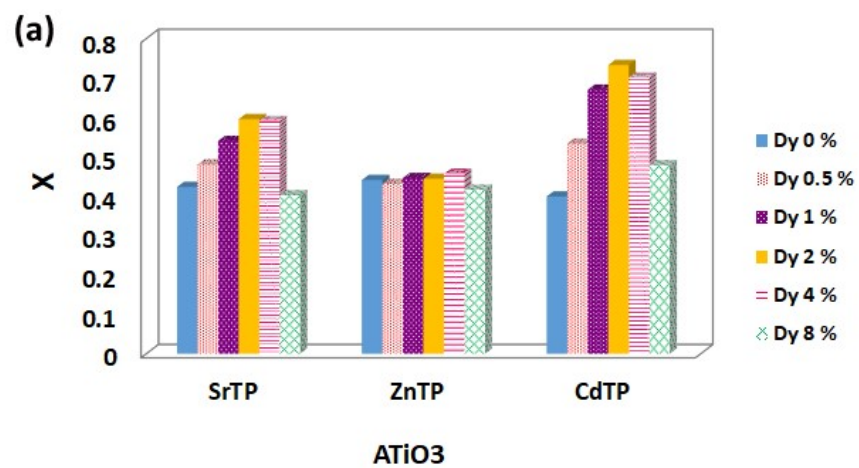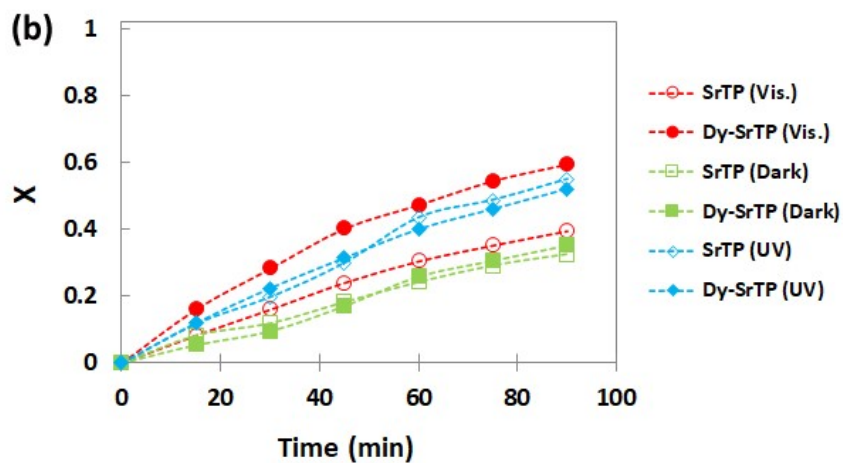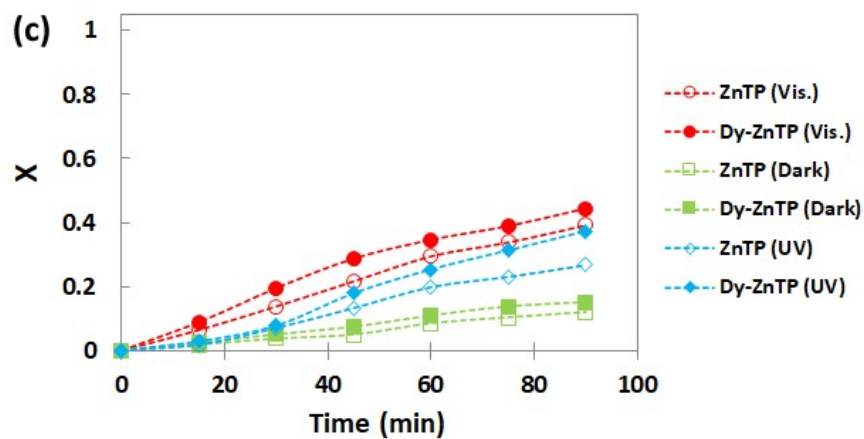

**Fig. S9.** (a) photocatalytic activity of doped ATiO<sub>3</sub> with different doping levels (i.e. 0.5, 1, 2, 4, 8% of Dy cation), (b) photocatalytic performance of SrTP and Dy-doped SrTP, and (c) ZnTP and Dy-doped ZnTP in degradation of MB.

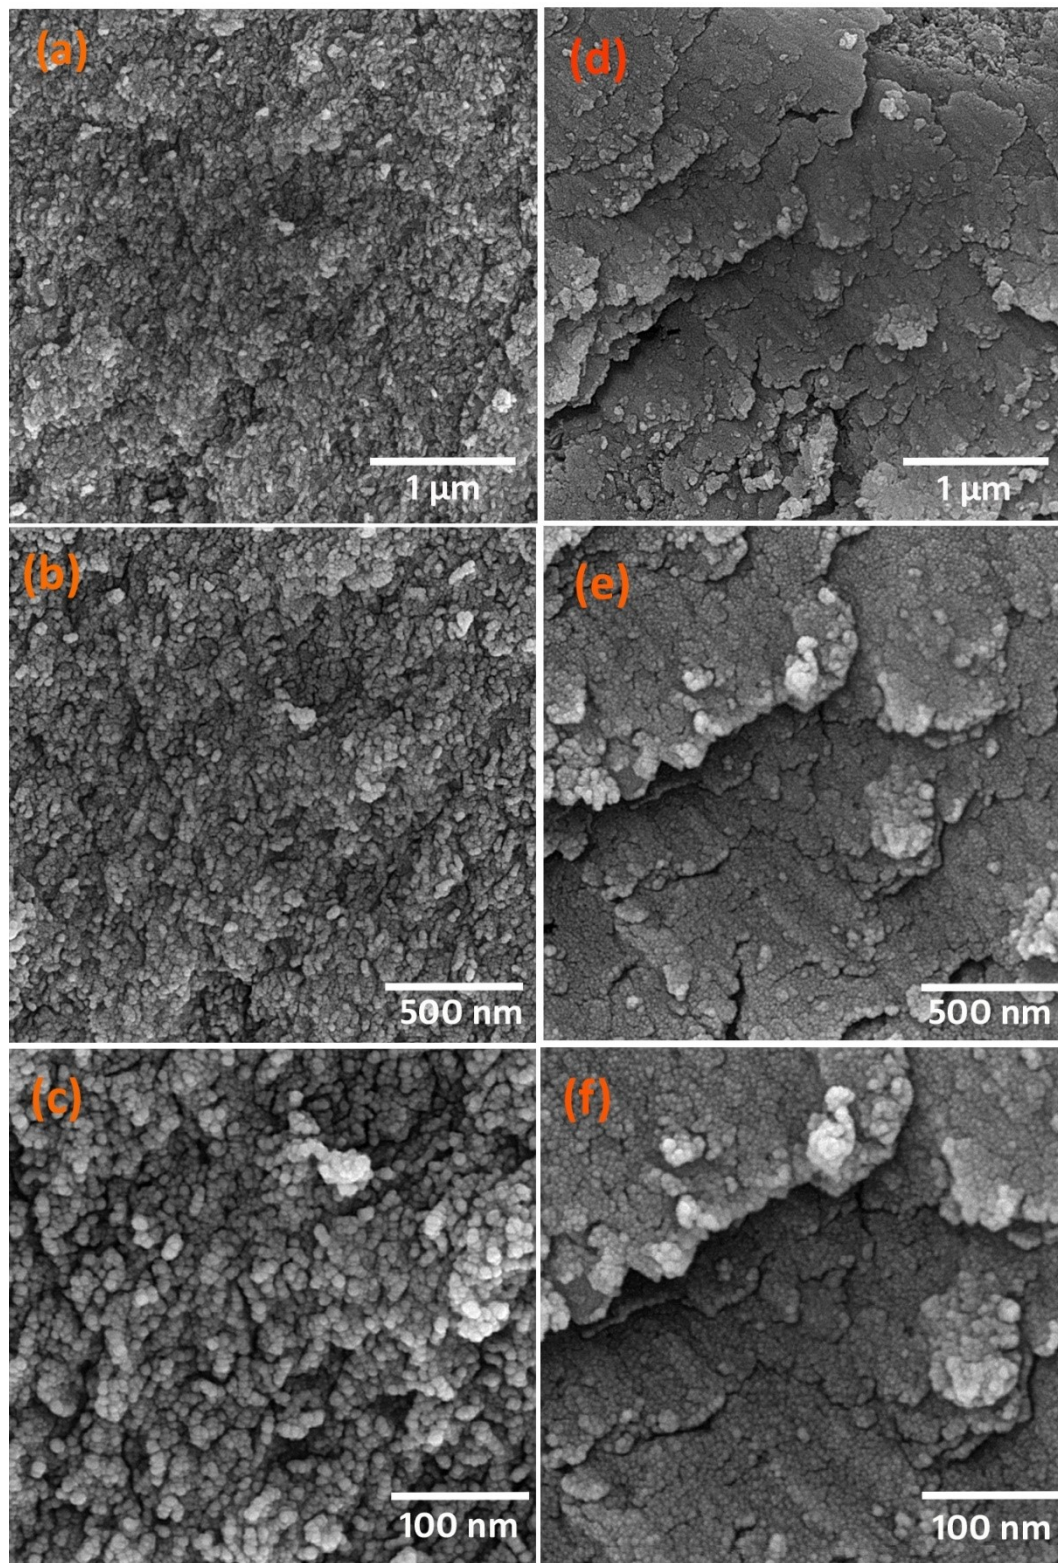

**Fig. S10.** FESEM images of Dy-CdTP(0.6)/ZnSQDs before (a, b and c) and after (d,e and f) five photocatalytic tests in degradation of MB.

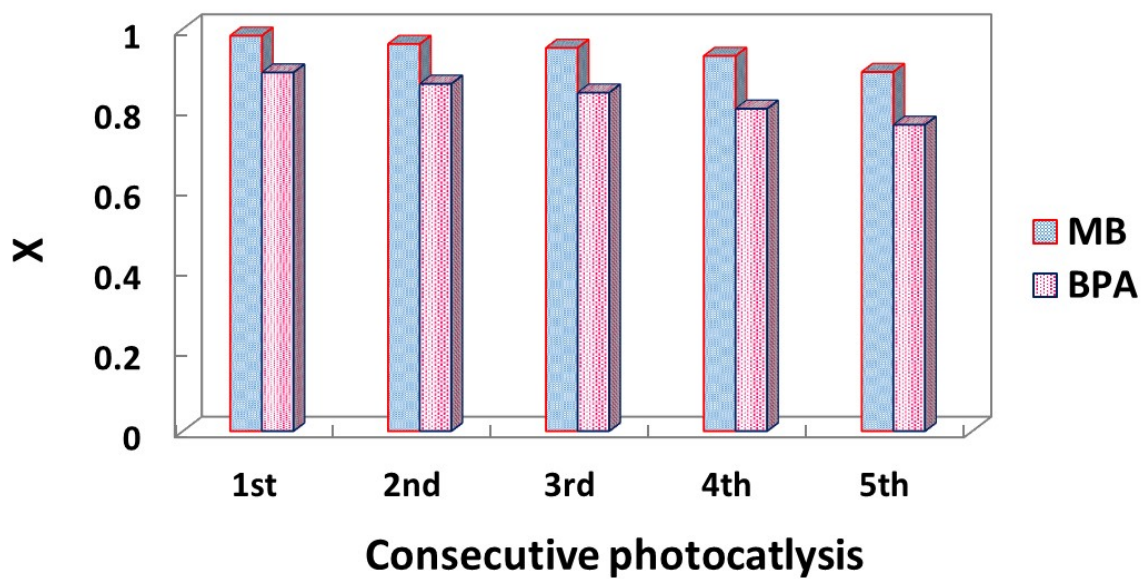

**Fig. S11.** Cycling photocatalytic stability test of as-prepared Dy-CdTP(0.6)/ZnSQDs photocatalyst.

**Table S1.** CdTiO<sub>3</sub> and ZnS QDs based photocatalysts and their photocatalytic applications.

| Photocatalyst                                        | Target                                                   | Experimental conditions                                                                                                  | Activity                                            | Ref.      |
|------------------------------------------------------|----------------------------------------------------------|--------------------------------------------------------------------------------------------------------------------------|-----------------------------------------------------|-----------|
| CdTiO <sub>3</sub> /CuFe <sub>2</sub> O <sub>4</sub> | MB <sup>1</sup> , RhB <sup>2</sup> , and MO <sup>3</sup> | 400 W high-pressure mercury lamp, 25 mg/L of Pollutant and 100 mg/L of Cat., [H <sub>2</sub> O <sub>2</sub> ]=0.15 mol/L | ≥95 (90 min)                                        | 1         |
| CdTiO <sub>3</sub> /RGO                              | MB                                                       | Ultraviolet-C (λ <sub>UV</sub> = 365 nm), 10 mg/L of Pollutant and 500 mg/L                                              | 80 (180 min)                                        | 2         |
| CdTiO <sub>3</sub> @S                                | CR <sup>4</sup> and CV <sup>5</sup>                      | Sun light, 10 mg/L of Pollutant and 1000 mg/L of Cat.                                                                    | 89% (60 min) for CV and 91% (60 min) for CR         | 3         |
| CdO + CdTiO <sub>3</sub>                             | MB                                                       | LED light, 2.5×10 <sup>-5</sup> mol/L of Pollutant                                                                       | ≥95 (300 min)                                       | 4         |
| ZnS QDs/MZnAl-LDH (M=Co or Mn)                       | AR14 <sup>6</sup>                                        | 300 W Xenon lamp (λ≥ 420 nm), 50 mg/L of Pollutant and 200 mg/L of Cat.                                                  | ≥95% (60 min)                                       | 5         |
| ZnS QDs-mesoporous TiO <sub>2</sub>                  | MB                                                       | Xenon lamp, 10 mg/L of Pollutant and 50 mg/L of Cat.                                                                     | 100% (32 min)                                       | 6         |
| CuInS <sub>2</sub> /ZnS QDs                          | RhB <sup>7</sup>                                         | 500 W high-pressure Hg lamp (λ≥ 420 nm), 10 mg/L of Pollutant and 600 g/L of Cat.                                        | ≥95% (120 min)                                      | 7         |
| Cu-doped ZnS QDs/TiO <sub>2</sub>                    | Salicylic acide                                          | Fluorescent lamp (365 nm, I = 1.5 mW/cm <sup>2</sup> ), 10 mg/L of Pollutant.                                            | 90% (150 min)                                       | 8         |
| ZnS QDs/RGO                                          | MB                                                       | High pressure Hg lamp (365 nm), 10 mg/L of Pollutant and 200 mg/L of Cat.                                                | ≥90% (120 min)                                      | 9         |
| ZnS QDs-TiO <sub>2</sub> nanofibers                  | MB                                                       | UV lamp (365 nm), 10 mg/L of Pollutant and photocatalyst films (area of 1×1 cm <sup>2</sup> ).                           | ≥90% (450 min)                                      | 10        |
| Gd-doped ZnS QDs/g-C <sub>3</sub> N <sub>4</sub>     | MB and BA <sup>8</sup>                                   | 300 W Xenon lamp (λ≥ 420 nm), 20 mg/L of Pollutant and 200 mg/L of Cat.                                                  | 95% (90 min) for AR14 and 81% (180 min) for BA and  | 11        |
| Dy-doped CdTiO <sub>3</sub> /ZnS                     | MB and BA                                                | 300 W Xenon lamp (λ≥ 420 nm), 20 mg/L of Pollutant and 200 mg/L of Cat.                                                  | ≥95% (60 min) for AR14 and 89% (180 min) for BA and | This Work |

<sup>1</sup>Methylene Blue, <sup>2</sup>Rhodamine B, <sup>3</sup>Methyl Orange, <sup>4</sup>Congo Red, <sup>5</sup>Crystal Violet, <sup>6</sup>Acid Red 14, <sup>7</sup>Rhodamin B, <sup>8</sup>Bisphenol A

## References:

1. K. Jahanara and S. Farhadi, *RSC Advances*, 2019, **9**, 15615-15628.
2. B. Pant, M. Park and S.-J. Park, *Materials Letters*, 2018, **228**, 365-368.
3. T. Tavakoli-Azar, A. R. Mahjoub, M. S. Sadjadi, N. Farhadyar and M. H. Sadr, *Journal of Inorganic and Organometallic Polymers and Materials*, 2020, **30**, 4858-4875.
4. M. E. de Anda Reyes, G. Torres Delgado, R. Castanedo Pérez, J. Márquez Marín and O. Zelaya Ángel, *Journal of Photochemistry and Photobiology A: Chemistry*, 2012, **228**, 22-27.
5. A. R. Amani-Ghadim, F. Khodam and M. S. Seyed Dorraji, *Journal of Materials Chemistry A*, 2019, **7**, 11408-11422.
6. S. Harish, M. Sabarinathan, A. P. Kristy, J. Archana, M. Navaneethan, H. Ikeda and Y. Hayakawa, *RSC Advances*, 2017, **7**, 26446-26457.
7. W. Zhang and X. Zhong, *Inorganic Chemistry*, 2011, **50**, 4065-4072.
8. H. Labiadh, T. B. Chaabane, L. Balan, N. Becheik, S. Corbel, G. Medjahdi and R. Schneider, *Applied Catalysis B: Environmental*, 2014, **144**, 29-35.
9. M. Wei, Y. Hong, D. Han, L. Yang, H. Liu and L. Su, *physica status solidi (a)*, 2018, **215**, 1800082.
10. S. Chaguetmi, F. Mammeri, S. Nowak, P. Decorse, H. Lecoq, M. Gaceur, J. Ben Naceur, S. Achour, R. Chtourou and S. Ammar, *RSC Advances*, 2013, **3**, 2572-2580.
11. A. R. Amani-Ghadim, S. Arefi-Oskoui, R. Mahmoudi, A. T. Saresheh, A. Khataee, F. Khodam and M. S. Seyed Dorraji, *Chemosphere*, 2022, **295**, 133917.
